# Supplementary material for: Facile low-temperature synthesis of hematite quantum dots anchored on a three-dimensional ultra-porous graphene-like framework as advanced anode materials for asymmetric supercapacitors
Source: Royal Society of Chemistry journal article supplement (doi:10.1039/c6ta02927b), 2016-01-01
Supplement: c6ta02927b1.pdf [file c6ta02927b1.pdf]

Supporting Information (SI)

**Facile low-temperature synthesis of hematite quantum dots  
anchored on three-dimensional ultra-porous graphene-like  
framework as advanced anode materials for asymmetric  
supercapacitors**

Yunyong Li<sup>a</sup>, Haiyan Zhang<sup>a, \*</sup>, Shanxing Wang<sup>a</sup>, Yingxin Lin<sup>a</sup>, Yiming Chen<sup>a</sup>,  
Zhicong Shi<sup>a</sup>, Na Li<sup>a</sup>, Wenguang Wang<sup>a</sup>, and Zaiping Guo<sup>a, b, \*</sup>

<sup>a</sup>*Guangdong Provincial Key Laboratory of Functional Soft Condensed Matter, School  
of Materials and Energy, Guangdong University of Technology, No. 100 Waihuan Xi  
Road, Guangzhou Higher Education Mega Center, Guangzhou 510006, China*

<sup>b</sup>*Institute for Superconducting and Electronic Materials, School of Mechanical,  
Materials and Mechatronics Engineering, University of Wollongong, North  
Wollongong, New South Wales 2500, Australia*

<sup>a, \*</sup>Corresponding author. Tel.: +86 20 39322570, Fax: +86 20 39322570, *E-mail*  
*address: [yyli@gdut.edu.cn](mailto:yyli@gdut.edu.cn) (Y. Y. Li), [hyzhang@gdut.edu.cn](mailto:hyzhang@gdut.edu.cn) (H. Y. Zhang).*

<sup>a, b, \*</sup>Corresponding author. Tel.: +61 2 4221 5225, Fax: +61 2 4221 5731, *E-mail*  
*address: [zguo@uow.edu.au](mailto:zguo@uow.edu.au) (Z. P. Guo).*

## 23 **Experimental section**

### 24 **Synthesis of the 3D GF**

25 The 3D GF was synthesized by an improved procedure according to our previous  
26 work<sup>S1</sup>. In brief, pre-treated macroporous acrylic type cation-exchange resin was  
27 firstly impregnated with 0.10 mol L<sup>-1</sup> nickel acetate solution (100 mL). The nickel  
28 ion-exchange resin was washed and dried. Then, the nickel ion-exchange resin (10 g)  
29 was added under stirring into 400 mL KOH/ethanol solution containing 45 g KOH  
30 and dried to form a nickel ion-exchange resin/KOH mixture. Finally, the mixture was  
31 heated at 850 °C for 2 h in N<sub>2</sub> atmosphere with a heating rate of 2 °C min<sup>-1</sup>. After  
32 cooling down to room temperature, the resulting sample was treated in 3 mol L<sup>-1</sup> HCl  
33 solution to remove the nickel nanoparticles and other impurities. The sample was  
34 finally washed and dried. The 3D GF powders were vacuum dried at 120 °C for 5 h.

### 35 **Calculation methods of supercapacitors in three-electrode and two-electrode** 36 **systems**

37 Three-electrode system. The gravimetric capacitance  $C_g$  (F g<sup>-1</sup>) of the active material  
38 could be calculated from the corresponding cyclic voltammetry curve by the  
39 following equation<sup>S2, S3</sup>:

$$40 \quad C_g = \frac{\int I(V) dV}{2\nu m \Delta V} \quad (S1)$$

41 where  $I(V)$  (A) is the response current,  $V$  (V) is the potential vs. Hg/HgO reference  
42 electrode,  $\nu$  (V s<sup>-1</sup>) is the scan rate,  $m$  (g) is the mass of the active material (including  
43 the mass of 3D GF) on the working electrode, and  $\Delta V$  (V) is the range of working

44 potential.

45 For the non-linear galvanostatic charging and discharging (GCD) plots:  $C_g$  (F g<sup>-1</sup>)

46 could be calculated using the following equation<sup>S4, S5</sup>:

47 
$$C_g = \frac{2I_m \int V dt}{V^2 \Big|_{V_i}^{V_f}} \quad (S2)$$

48 where  $I_m = I/m$  (A g<sup>-1</sup>) is the current density,  $I$  (A) is the current, and  $m$  (g) is the mass

49 of the active material (including the weight of 3D GF) on the working electrode,  $\int V dt$

50 is the integral current area, where  $V$  (V, taking absolute value, here is 0.6 V) is the

51 potential, with initial and final values of  $V_i$  and  $V_f$ , respectively.

52 For the linear GCD plots:  $C_g$  (F g<sup>-1</sup>) could be calculated using the following equation:

53 
$$C_g = \frac{I \Delta t}{m \Delta V} \quad (S3)$$

54 where  $I$  (A) is the current,  $\Delta t$  (s) is the charging time,  $m$  (g) is the mass of the active

55 material on the working electrode, and  $\Delta V$  (V) is the range of working potential.

56 Two-electrode system. The specific capacitance  $C_{ASC}$  (F g<sup>-1</sup>) of the ASC device could

57 be calculated from the corresponding galvanostatic discharging curve according to the

58 following equation:

59 
$$C_{ASC} = \frac{I \Delta t}{M \Delta V} \quad (S4)$$

60 where  $I$  (A) is the discharging current,  $\Delta t$  (s) is the discharging time,  $\Delta V$  (V) is the

61 potential window during discharging,  $M$  (g) is the total mass of active materials in the

62 ASC device. The equivalent series resistance ( $R_{ESR}$ ) ( $\Omega$ ) of the device could be

63 calculated by:

64 
$$R_{ESR} = \Delta V_{drop} / (2I) \quad (S5)$$

65 where  $\Delta V_{drop}$  (V) is the abrupt voltage drop at the beginning of the discharging curve,

66  $I$  (A) is the corresponding current. The energy density  $E$  (Wh kg<sup>-1</sup>) and average power  
 67 density  $P$  (W kg<sup>-1</sup>) could be calculated as:

$$68 \quad E = \frac{0.5C_{ASC}V^2}{3.6} \quad (S6)$$

$$69 \quad P = E/t \quad (S7)$$

70 where  $V$  (V) is the potential of the ASC and  $t$  (s) is the corresponding discharging  
 71 time.

72 The maximum power density ( $P_{\max}$ ) calculated from  $R_{\text{ESR}}$  and normalized by the mass  
 73 of the cell (two electrodes) is given by  $P_{\max} = V^2/(4mR_{\text{ESR}})$ .

74

## 75 **Additional results:**

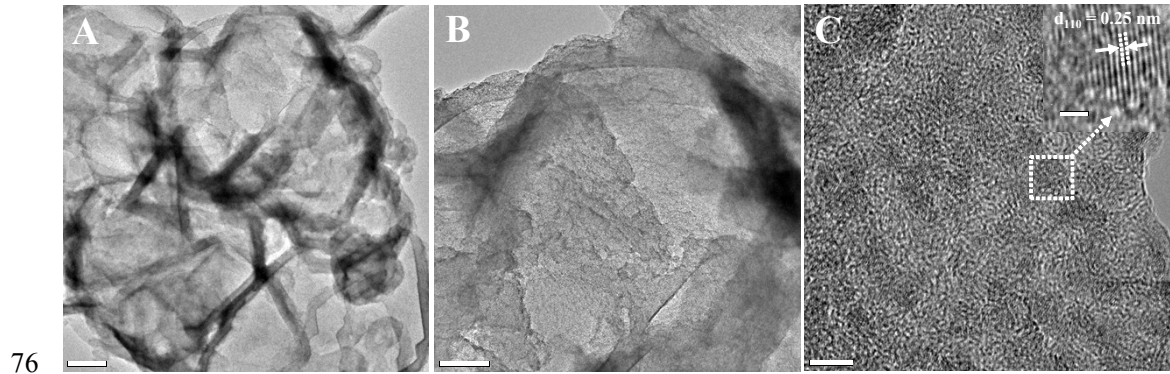

77 **Fig. S1** (A, B) TEM images and (C) high-resolution TEM image of Fe<sub>2</sub>O<sub>3</sub>-QDs-3D  
 78 GF hybrid composite. Inset in (C) is an enlarged view corresponding to the area  
 79 outlined by the white square.

80

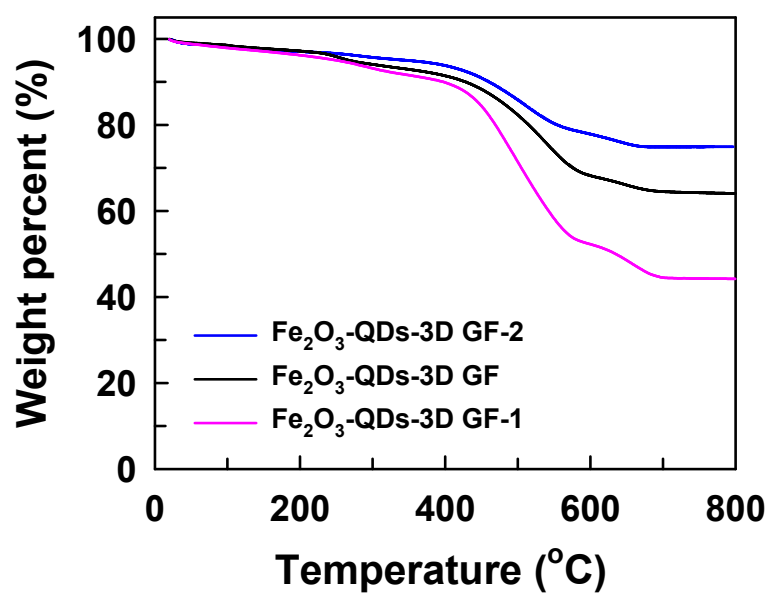

81

82 **Fig. S2** Thermogravimetric analysis (TGA) of three Fe<sub>2</sub>O<sub>3</sub>-QDs-3D GF composites  
 83 with different contents of Fe<sub>2</sub>O<sub>3</sub>-QDs. The TGA was conducted under air at a heating  
 84 rate of 10 °C min<sup>-1</sup> from room temperature to 800 °C. The contents of Fe<sub>2</sub>O<sub>3</sub> in the  
 85 three Fe<sub>2</sub>O<sub>3</sub>-QDs-3D GF composites were calculated by TGA, which are ~74.9 wt%,  
 86 ~64.1 wt%, and ~44.2 wt%, respectively.

87

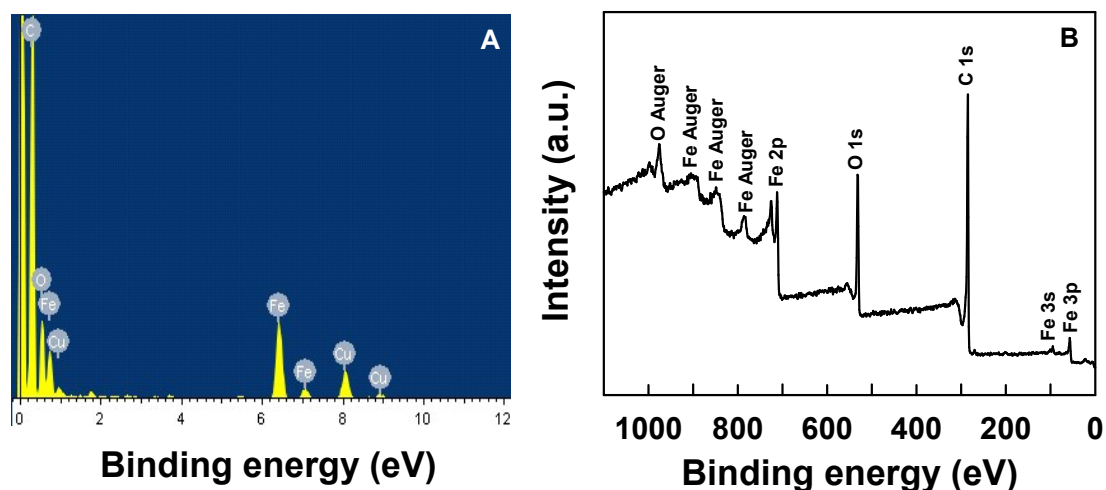

88

89 **Fig. S3** EDS spectrum (A) and XPS survey spectrum (B) of Fe<sub>2</sub>O<sub>3</sub>-QDs-3D GF  
 90 composite.

91

92 The TEM-based EDS spectrum and the XPS survey spectrum in Fig. S3 further

93 demonstrate that only C, O, and Fe exist in the composite, while the Cu is derived  
 94 from the copper grid. The results further confirm the successful deposition of Fe<sub>2</sub>O<sub>3</sub>-  
 95 QDs on the 3D GF.

96

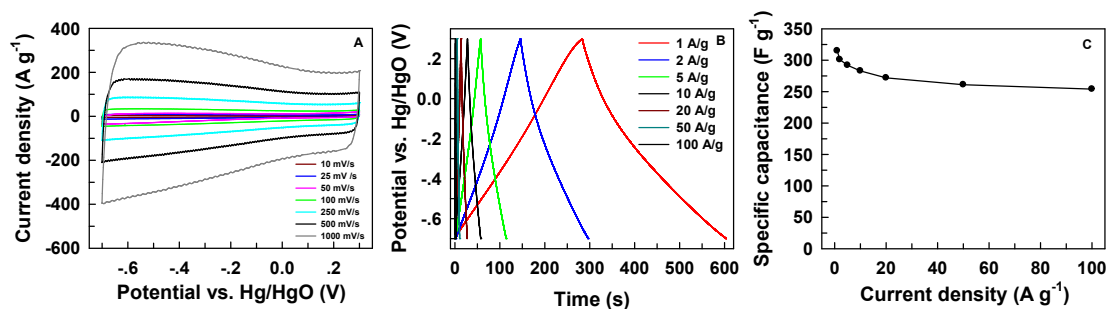

97

98 **Fig. S4** Electrochemical performance of 3D HPG in three-electrode system in 2 mol  
 99 L<sup>-1</sup> KOH aqueous solution. (A) CV curves at various scan rates, (B) galvanostatic  
 100 charge/discharge curves at different current densities, and (C) specific capacitance as  
 101 a function of current density.

102

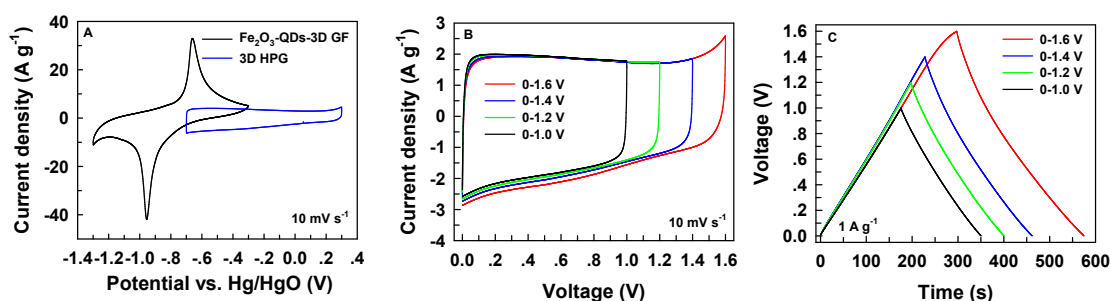

103

104 **Fig. S5** (A) CV curves of 3D HPG and Fe<sub>2</sub>O<sub>3</sub>-QDs-3D GF electrodes in the three-  
 105 electrode system in 2.0 mol L<sup>-1</sup> KOH aqueous solution at 10 mV s<sup>-1</sup>. (B) CV curves  
 106 and (C) galvanostatic charge/discharge curves of Fe<sub>2</sub>O<sub>3</sub>-QDs-3D GF//3D HPG ASC at  
 107 1.0 A g<sup>-1</sup>.

108

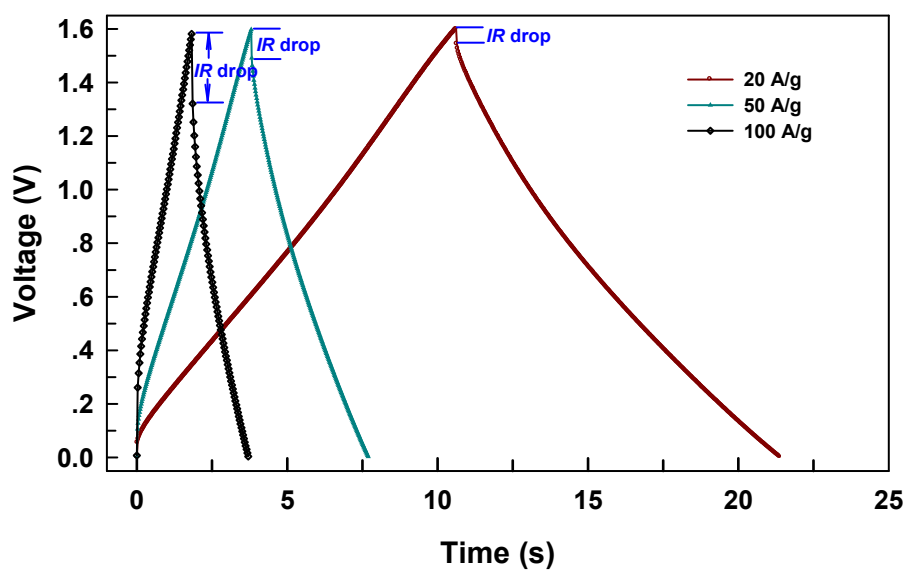

109

110 **Fig. S6** Galvanostatic charge/discharge curves and *IR* drops of Fe<sub>2</sub>O<sub>3</sub>-QDs-3D

111 GF//3D HPG ASCs at various high current densities.

112

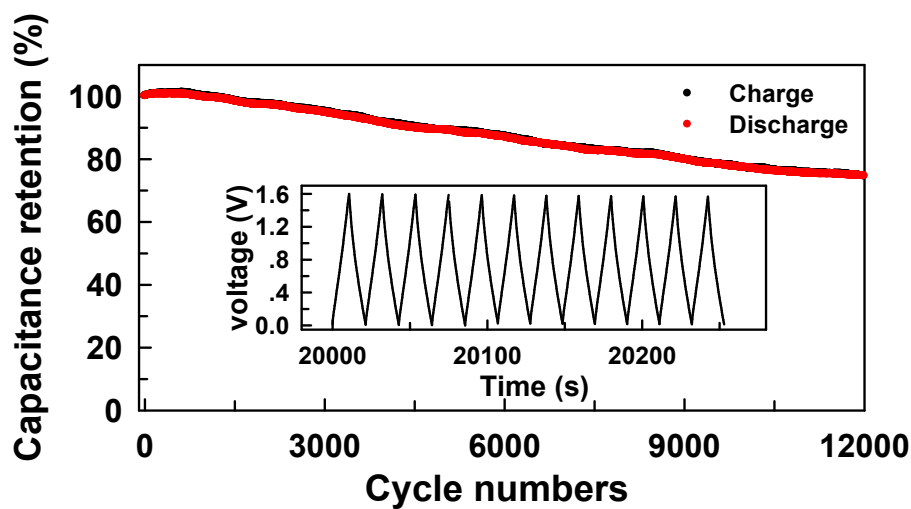

113

114 **Fig. S7** Cycling stability test at current density of 20 A g<sup>-1</sup> for Fe<sub>2</sub>O<sub>3</sub>-QDs-3D GF//3D

115 HPG ASC after the test for 10000 cycles at 2.0 A g<sup>-1</sup>. Inset shows the stability of the

116 voltage as a function of time.

117

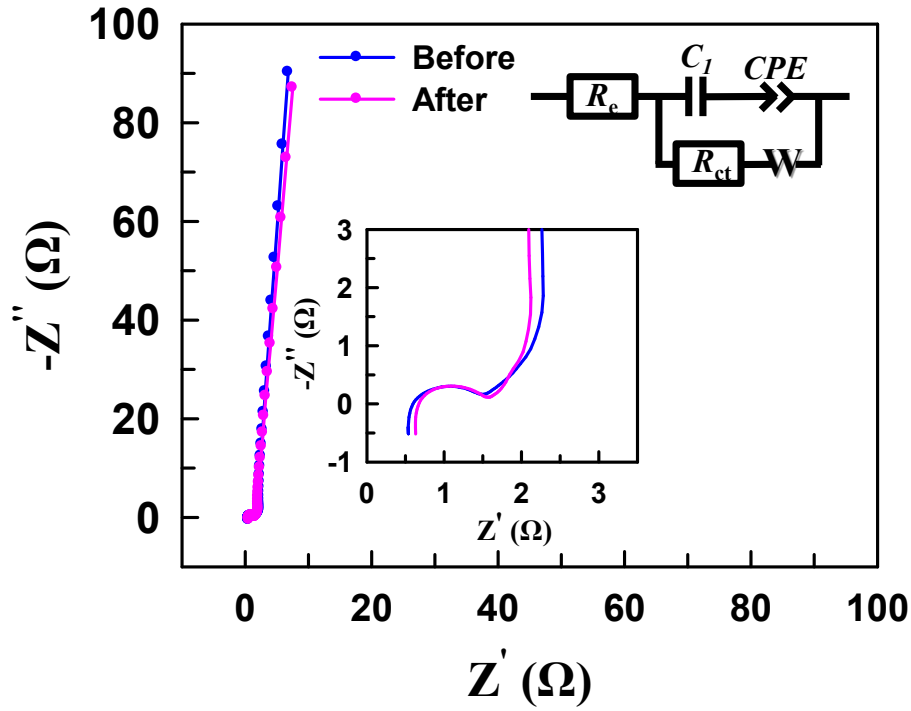

118

119 **Fig. S8** Nyquist plots and their expanded high-frequency region (lower inset) of an  
 120 Fe<sub>2</sub>O<sub>3</sub>-QDs-3D GF//3D HPG ASC before and after cycling stability testing for 12000  
 121 cycles at 20 A g<sup>-1</sup> (measured in the frequency range of 100 kHz - 0.01 Hz at open  
 122 circuit potential with an ac perturbation of 5 mV). The upper inset in Fig. S8 is the  
 123 equivalent circuit.  $R_e$  stands for the combined ionic resistance of the electrolyte,  
 124 intrinsic resistance of the substrate, and contact resistance at the active  
 125 material/current collector interface, while  $R_{ct}$  is charge-transfer resistance caused by  
 126 the Faradaic reactions and the double-layer capacitance on the grain surface.  $C_1$  is the  
 127 double layer capacitance,  $W$  is the Warburg impedance, and CPE represents the  
 128 constant phase element.

129

130

131 **Table S1** Physical characteristics of 3D GF, three Fe<sub>2</sub>O<sub>3</sub>-QDs-3D GF composites,  
 132 and pure Fe<sub>2</sub>O<sub>3</sub>.



| Samples                                     | BET total surface area (m <sup>2</sup> g <sup>-1</sup> ) | Total pore volume (cm <sup>3</sup> g <sup>-1</sup> ) | Conductivity (×10 <sup>3</sup> S m <sup>-1</sup> ) |
|---------------------------------------------|----------------------------------------------------------|------------------------------------------------------|----------------------------------------------------|
| 3D GF                                       | 2250                                                     | 1.38                                                 | 1.40                                               |
| Fe <sub>2</sub> O <sub>3</sub> -QDs-3D GF-1 | 1159                                                     | 0.86                                                 | 1.31                                               |
| Fe <sub>2</sub> O <sub>3</sub> -QDs-3D GF   | 734                                                      | 0.58                                                 | 1.25                                               |
| Fe <sub>2</sub> O <sub>3</sub> -QDs-3D GF-2 | 507                                                      | 0.42                                                 | 0.95                                               |
| Pure Fe <sub>2</sub> O <sub>3</sub>         | 18                                                       | 0.06                                                 | ---                                                |

133

134 **Table S2** Comparison of the electrochemical performances of different

135 Fe<sub>2</sub>O<sub>3</sub>/graphene-based electrodes.

| Electrode material                                     | SSA (m <sup>2</sup> g <sup>-1</sup> ) <sup>a</sup> | Electrolyte                         | Calculation methods for <sup>b</sup> C <sub>g</sub> | C <sub>g</sub> (F g <sup>-1</sup> ) | Rate capability (F g <sup>-1</sup> ) | Year and Ref.       |
|--------------------------------------------------------|----------------------------------------------------|-------------------------------------|-----------------------------------------------------|-------------------------------------|--------------------------------------|---------------------|
| Graphene/Fe <sub>2</sub> O <sub>3</sub> /polyaniline   |                                                    | 1 M KOH                             | $C_g = \frac{I\Delta t}{m\Delta V}$                 | 638 at 1.0 mV s <sup>-1</sup>       |                                      | 2012 <sup>S6</sup>  |
| Graphene/Fe <sub>2</sub> O <sub>3</sub> nanorods       | 87.9                                               | 6 M KOH                             | $C_g = \frac{I\Delta t}{m\Delta V}$                 | 320 at 10 mA cm <sup>-2</sup>       | 152 at 100 mA cm <sup>-2</sup>       | 2013 <sup>S7</sup>  |
| Fe <sub>2</sub> O <sub>3</sub> /graphene               | 357.6                                              | 1 M Na <sub>2</sub> SO <sub>4</sub> | $C_g = \frac{I\Delta t}{m\Delta V}$                 | 226 at 1.0 A g <sup>-1</sup>        | 90.8 at 5 A g <sup>-1</sup>          | 2013 <sup>S8</sup>  |
| Fe <sub>2</sub> O <sub>3</sub> /N-rGO hydrogel         | 171.5                                              | 1 M KOH                             | $C_g = \frac{I\Delta t}{m\Delta V}$                 | 618 at 0.5 A g <sup>-1</sup>        | 350 at 10 A g <sup>-1</sup>          | 2014 <sup>S9</sup>  |
| α-Fe <sub>2</sub> O <sub>3</sub> mesocrystals/graphene | 89.1                                               | 1 M Na <sub>2</sub> SO <sub>4</sub> | $C_g = \frac{I\Delta t}{m\Delta V}$                 | 306.9 at 3.0 A g <sup>-1</sup>      | 98.2 at 10 A g <sup>-1</sup>         | 2014 <sup>S10</sup> |
| Graphene/Fe <sub>2</sub> O <sub>3</sub>                | 173                                                | 1 M KOH                             | $C_g = \frac{I\Delta t}{m\Delta V}$                 | 908 at 2.0 A g <sup>-1</sup>        | ~700 at 30 A g <sup>-1</sup>         | 2014 <sup>S11</sup> |
| N-rGO/Fe <sub>2</sub> O <sub>3</sub>                   | 56.2                                               | 1 M KOH                             | $C_g = \frac{I\Delta t}{m\Delta V}$                 | 268.4 at 2.0 A g <sup>-1</sup>      | 137.0 at 5 A g <sup>-1</sup>         | 2015 <sup>S12</sup> |
| Porous Fe <sub>2</sub> O <sub>3</sub> /graphene        | 95.9                                               | 1 M Na <sub>2</sub> SO <sub>4</sub> | $C_g = \frac{I\Delta t}{m\Delta V}$                 | 343.7 at 1.0 A g <sup>-1</sup>      | 182.1 at 10 A g <sup>-1</sup>        | 2015 <sup>S13</sup> |
| G-Fe <sub>2</sub> O <sub>3</sub>                       | 127.8                                              | 3 M KOH                             | $C_g = \frac{I\Delta t}{m\Delta V}$                 | 1095 at 3.0 A g <sup>-1</sup>       | 506.6 at 30 A g <sup>-1</sup>        | 2015 [S3]           |
| Fe <sub>2</sub> O <sub>3</sub> /FGS                    | 208                                                | 1 M Na <sub>2</sub> SO <sub>4</sub> | $C_g = \frac{I\Delta t}{m\Delta V}$                 | 347 at 10 mV s <sup>-1</sup>        | 140 at 1600 mV s <sup>-1</sup>       | 2015 <sup>S14</sup> |

|                                                         |     |         |                                                 |                               |                               |                     |
|---------------------------------------------------------|-----|---------|-------------------------------------------------|-------------------------------|-------------------------------|---------------------|
| GF-CNT@400Fe <sub>2</sub> O <sub>3</sub>                |     | 2 M KOH | $C_g = \frac{I\Delta t}{m\Delta V}$             | 580.6 at 5 A g <sup>-1</sup>  | 370.2 at 40 A g <sup>-1</sup> | 2015 <sup>S15</sup> |
| rGO/PEDOT:PSS/ $\alpha$ -Fe <sub>2</sub> O <sub>3</sub> | 269 | 1 M KOH | $C_g = \frac{I\Delta t}{m\Delta V}$             | 859 at 0.5 A g <sup>-1</sup>  | 691 at 100 mV s <sup>-1</sup> | 2016 <sup>S16</sup> |
| Fe <sub>2</sub> O <sub>3</sub> -QDs-3D GF               | 734 | 2 M KOH | $C_g = \frac{I\Delta t}{m\Delta V}$             | 1014 at 1.0 A g <sup>-1</sup> | 732 at 30 A g <sup>-1</sup>   | <b>This work</b>    |
|                                                         |     |         | $C_g = \frac{2I_m \int V dt}{V^2 _{V_i}^{V_f}}$ | 945 at 1.0 A g <sup>-1</sup>  | 677 at 30 A g <sup>-1</sup>   |                     |

136 <sup>a</sup>SSA: specific surface area, <sup>b</sup>C<sub>g</sub>: gravimetric capacitance. <sup>c</sup>Note: the non-linear galvanostatic discharging plots  
137 present typical battery-like features. Therefore,  $C = \Delta Q/\Delta V = I\Delta t/\Delta V$  is not applicable for calculating the  
138 capacitance<sup>S4, S5</sup>. Using such an equation ( $C = I\Delta t/\Delta V$ ) will usually overestimate the specific capacitance for  
139 discharging. In this work, the C<sub>g</sub> is calculated according to Equation (S2). To show the contrast, the C<sub>g</sub> is also  
140 calculated according to the Equation (S3).

141 It is clear that our as-prepared electrode is superior to those of its most recent  
142 counterparts with high performance.

143

144 **Table S3** Comparison of the electrical conductivity of 3D GF with those of typical  
145 self-assembled 3D graphene samples.

| Samples                                          | Test method | Conductivity<br>(S m <sup>-1</sup> ) | Ref.             |
|--------------------------------------------------|-------------|--------------------------------------|------------------|
| Graphene aerogel                                 | Four probe  | ~100                                 | S17              |
| Graphene hydrogel                                | Four probe  | 110                                  | S18              |
| 3D graphene monoliths                            |             | 87                                   | S19              |
| Graphene xerogel                                 |             | 500                                  | S20              |
| Honeycomb-like 3D graphene                       |             | 649                                  | S21              |
| Honeycomb-like 3D graphene                       |             | ~0.12                                | S22              |
| Graphene hydrogel films                          |             | 192                                  | S23              |
| 3D graphene-based bulk materials                 |             | ~100                                 | S24              |
| 3D porous graphene films                         |             | 1024                                 | S25              |
| Graphene fibers                                  |             | 800-1000                             | S26              |
| 3D graphene aerogels                             | Four probe  | 1                                    | S27              |
| 3D hierarchical porous graphene/carbon composite |             | 152                                  | S28              |
| 3D GF                                            | Four probe  | 1400                                 | <b>This work</b> |

146 It is clear that our as-prepared 3D GF is superior to most typical self-assembled  
147 3D graphene materials in the literature.

148

149 **Table S4.** Impedance parameters of the electrodes with the three Fe<sub>2</sub>O<sub>3</sub>-QDs-3D GF  
150 composites, and the 3D GF, and pure Fe<sub>2</sub>O<sub>3</sub> electrodes.

| Samples                                     | $R_s$ ( $\Omega$ ) | $R_{ct}$ ( $\Omega$ ) |
|---------------------------------------------|--------------------|-----------------------|
| Fe <sub>2</sub> O <sub>3</sub> -QDs-3D GF   | 1.1                | 0.36                  |
| Fe <sub>2</sub> O <sub>3</sub> -QDs-3D GF-1 | 1.0                | 0.32                  |
| Fe <sub>2</sub> O <sub>3</sub> -QDs-3D GF-2 | 1.3                | 1.3                   |
| 3D GF                                       | 1.0                | 0.30                  |
| Pure Fe <sub>2</sub> O <sub>3</sub>         | 2.5                | 8.0                   |

151 **Table S5.** Impedance parameters of the Fe<sub>2</sub>O<sub>3</sub>-QDs-3D GF//3D HPG ASC before and  
152 after the cycling stability testing for 12000 cycles at 20 A g<sup>-1</sup>.

| Samples                                    | $R_s$ ( $\Omega$ ) | $R_{ct}$ ( $\Omega$ ) |
|--------------------------------------------|--------------------|-----------------------|
| Before                                     | 0.60               | 1.1                   |
| After 12000 cycles at 20 A g <sup>-1</sup> | 0.68               | 1.1                   |

153

## 154 References

155 S1 Y. Y. Li, Z. S. Li, P. K. Shen, *Adv. Mater.*, 2013, **25**, 2474-2480.

156 S2 H. Zhang, Q. Gao, K. Yang, Y. Tan, W. Tian, L. Zhu, Z. Li, C. Yang, *J. Mater.*

157 *Chem. A*, 2015, **3**, 22005-22011.

158 S3 J. Chen, J. Xu, S. Zhou, N. Zhao, C.-P. Wong, *Nano Energy*, 2015, **15**, 719-728.

159 S4 L. Q. Mai, A. Minhas-Khan, X. Tian, K. M. Hercule, Y.-L. Zhao, X. Lin, X. Xu,

160 *Nat. Commun.*, 2013, **4**, 2923.

161 S5 B. Akinwolemiwa, C. Peng, G. Z. Chen, *J. Electrochem. Soc.*, 2015, **162**, A5054-

162 A5059.

163 S6 X. Xia, Q. Hao, W. Lei, W. Wang, D. Sun, X. Wang, *J. Mater. Chem.*, 2012, **22**,

164 16844-16850.

165 S7 W. Yang, Z. Gao, J. Wang, B. Wang, L. Liu, *Solid State Sci.*, 2013, **20**, 46-53.

166 S8 Z. Wang, C. Ma, H. Wang, Z. Liu, Z. Hao, *J. Alloys. Compd.*, 2013, **552**, 486-491.

167 S9 Z. Ma, X. Huang, S. Dou, J. Wu, S. Wang, *J. Phys. Chem. C*, 2014, **118**, 17231-

168 17239.

169 S10 S. Yang, X. Song, P. Zhang, J. Sun, L. Gao, *Small*, 2014, **10**, 2270-2279.

170 S11 H. Wang, Z. Xu, H. Yi, H. Wei, Z. Guo, X. Wang, *Nano Energy*, 2014, **7**, 86-96.

171 S12 H. Liu, J. Zhang, D. Xu, L. Huang, S. Tan, W. Mai, *J. Solid State Electrochem.*,

172 2015, **19**, 135-144.

173 S13 S. Yang, X. Song, P. Zhang, L. Gao, *ACS Appl. Mater. Interfaces*, 2015, **7**, 75-

174 79.

175 S14 H. Xia, C. Hong, B. Li, B. Zhao, Z. Lin, M. Zheng, S. V. Savilov, S. M.

176 Aldoshin, *Adv. Funct. Mater.*, 2015, **25**, 627-635.

177 S15 C. Guan, J. Liu, Y. Wang, L. Mao, Z. Fan, Z. Shen, H. Zhang, J. Wang, *ACS*

178 *Nano*, 2015, **9**, 5198-5207.

- 179 S16 M. M. Islam, D. Cardillo, T. Akhter, S. H. Aboutalebi, H. K. Liu, K.  
180 Konstantinov, S. X. Dou, *Part. Part. Syst. Character.*, 2016, **33**, 27-37.
- 181 S17 M. A. Worsley, P. J. Pauzauskie, T. Y. Olson, J. Biener, J. H. Satcher Jr, T. F.  
182 Baumann, *J. Am. Chem. Soc.*, 2010, **132**, 14067-14069.
- 183 S18 W. Chen, L. Yan, *Nanoscale*, 2011, **3**, 3132-3137.
- 184 S19 M. A. Worsley, T. Y. Olson, J. R. Lee, T. M. Willey, M. H. Nielsen, S. K.  
185 Roberts, P. J. Pauzauskie, J. Biener, J. H. Satcher Jr, T. F. Baumann, *J. Phys.*  
186 *Chem. Lett.*, 2011, **2**, 921-925.
- 187 S20 H. D. Pham, V. H. Pham, T. V. Cuong, T.-D. Nguyen-Phan, J. S. Chung, E. W.  
188 Shin, S. Kim, *Chem. Commun.*, 2011, **47**, 9672-9674.
- 189 S21 S. H. Lee, H. W. Kim, J. O. Hwang, W. J. Lee, J. Kwon, C. W. Bielawski, R. S.  
190 Ruoff, S. O. Kim, *Angew. Chem. Int. Edit.*, 2010, **122**, 10282-10286.
- 191 S22 L. Qiu, J. Z. Liu, S. L. Chang, Y. Wu, D. Li, *Nat. Commun.*, 2012, **3**, 1241.
- 192 S23 Y. Xu, Z. Lin, X. Huang, Y. Liu, Y. Huang, X. Duan, *ACS Nano*, 2013, **7**,  
193 4042-4049.
- 194 S24 L. Zhang, F. Zhang, X. Yang, G. Long, Y. Wu, T. Zhang, K. Leng, Y. Huang, Y.  
195 Ma, A. Yu, *Sci. Rep.*, 2013, **3**, 1408.
- 196 S25 B. G. Choi, M. Yang, W. H. Hong, J. W. Choi, Y. S. Huh, *ACS Nano*, 2012, **6**,  
197 4020-4028.
- 198 S26 Y. Zhao, C. Jiang, C. Hu, Z. Dong, J. Xue, Y. Meng, N. Zheng, P. Chen, L. Qu,  
199 *ACS Nano*, 2013, **7**, 2406-2412.
- 200 S27 G. Tang, Z.-G. Jiang, X. Li, H.-B. Zhang, A. Dasari, Z.-Z. Yu, *Carbon*, 2014, **77**,

201        592-599.

202   S28 X. J. Li, W. Xing, J. Zhou, G. Q. Wang, S. P. Zhuo, Z. F. Yan, Q. Z. Xue, S. Z.

203        Qiao, *Chem. Eur. J.*, 2014, **20**, 13314-13320.

204
